# Supplementary material
Source: HighWire-hosted journal article supplement (http://www.jrheum.org/highwire/filestream/29723/field_highwire_adjunct_files/0/141278DataSuppl.pdf)
Supplement: 141278DataSuppl.pdf [file 141278DataSuppl.pdf]

**ONLINE SUPPLEMENTARY DATA**

*Supplementary Table 1.* Treatment outcomes for all patients at week 12, by disease duration subgroup\*

|                         |     | <b>Disease Duration and Treatment (n)</b> |                          |                           |                      |
|-------------------------|-----|-------------------------------------------|--------------------------|---------------------------|----------------------|
|                         |     | <b>≤ 2 Years</b>                          | <b>&gt; 2 to 5 Years</b> | <b>&gt; 5 to 10 Years</b> | <b>&gt; 10 Years</b> |
|                         |     | ETN (225)                                 | ETN (142)                | ETN (150)                 | ETN (291)            |
|                         |     | SSZ (56)                                  | SSZ (37)                 | SSZ (31)                  | SSZ (51)             |
| <b>Tx</b>               |     | PBO (50)                                  | PBO (28)                 | PBO (46)                  | PBO (96)             |
| ASAS20,                 | ETN | 171/225 (76.0)†                           | 99/140 (70.7)†           | 108/151 (71.5)†           | 191/289 (66.1)†      |
| <i>n/N (%)</i>          | SSZ | 28/56 (50.0)                              | 17/37 (45.9)             | 20/31 (64.5)              | 28/51 (54.9)         |
|                         | PBO | 22/50 (44.0)‡                             | 4/28 (14.3)‡             | 14/46 (30.4)‡             | 26/96 (27.1)‡        |
| BASDAI50                | ETN | 137/225 (60.9)                            | 89/141 (63.1)            | 84/151 (55.6)             | 159/289 (55.0)       |
| <i>n/N (%)</i>          | SSZ | 19/56 (33.9)                              | 15/37 (40.5)             | 14/31 (45.2)              | 17/51 (33.3)         |
|                         | PBO | 10/50 (20.0)                              | 1/28 (3.6)               | 11/46 (23.9)              | 15/96 (15.6)         |
| ASDAS $\Delta \geq 2.0$ | ETN | 81/225 (36.0)                             | 56/141 (39.7)            | 64/150 (42.7)             | 112/289 (38.8)       |
| <i>n/N (%)</i>          | SSZ | 3/56 (5.4)                                | 4/36 (11.1)              | 3/31 (9.7)                | 3/50 (6.0)           |
|                         | PBO | 3/50 (6.0)                                | 1/28 (3.6)               | 3/46 (6.5)                | 9/96 (9.4)           |
| ASDAS inactive          | ETN | 61/225 (27.1)                             | 30/141 (21.3)            | 35/150 (23.3)             | 62/289 (21.5)        |
| disease                 | SSZ | 3/56 (5.4)                                | 4/36 (11.1)              | 3/31 (9.7)                | 3/50 (6.0)           |
| <i>n/N (%)</i>          | PBO | 3/50 (6.0)                                | 0/28 (0.0)               | 5/46 (10.9)               | 9/96 (9.4)           |
| ASDAS-CRP               | ETN | -1.7 (-1.9, -1.6)                         | -1.6 (-1.8, -1.5)        | -1.6 (-1.8, -1.5)         | -1.6 (-1.7, -1.5)    |

|                |     |                       |                      |                      |                      |
|----------------|-----|-----------------------|----------------------|----------------------|----------------------|
|                | SSZ | -0.8 (-1.0, -0.5)     | -0.8 (-1.1, -0.5)    | -0.9 (-1.2, -0.6)    | -0.7 (-1.0, -0.5)    |
|                | PBO | -0.6 (-0.9, -0.4)     | -0.1 (-0.4, 0.3)     | -0.4 (-0.7, -0.1)    | -0.4 (-0.6, -0.2)    |
| BASDAI         | ETN | -32.5 (-35.8, -29.2)  | -29.5 (-33.4, -25.6) | -29.6 (-33.4, -25.8) | -29.0 (-31.6, -26.4) |
|                | SSZ | -17.0 (-22.7, -11.4)  | -21.5 (-28.6, -14.3) | -19.5 (-27.1, -11.9) | -18.3 (-24.3, -12.4) |
|                | PBO | -16.2 (-22.1, -10.3)  | -4.5 (-12.1, 3.1)    | -13.0 (-19.1, -7.0)  | -11.1 (-15.5, -6.7)  |
| BASFI          | ETN | -25.0 (-28.4, -21.6)  | -24.2 (-28.1, -20.2) | -23.1 (-26.9, -19.3) | -21.3 (-23.9, -18.6) |
|                | SSZ | -12.1 (-17.7, -6.4)   | -17.3 (-24.5, -10.2) | -16.6 (-24.1, -9.0)  | -15.3 (-21.2, -9.4)  |
|                | PBO | -12.7 (-18.3, -7.2)‡  | 2.3 (-4.8, 9.3)‡     | -7.1 (-12.7, -1.4)‡  | -6.6 (-10.8, -2.4)‡  |
| CRP (mg/L)     | ETN | -13.0 (-14.7, -11.4)  | -13.3 (-15.2, -11.4) | -11.7 (-13.5, -9.9)  | -12.8 (-14.1, -11.5) |
|                | SSZ | -4.9 (-7.9 to -1.9)†‡ | -3.5 (-7.2 to 0.2)†‡ | -1.7 (-5.8 to 2.3)†‡ | 1.8 (-1.4 to 5.0)†‡  |
|                | PBO | -2.7 (-7.0 to 1.5)    | 1.7 (-3.7 to 7.1)    | 2.9 (-1.4 to 7.3)    | -2.5 (-5.7 to 0.6)   |
| Modified       | ETN | 1.0 (0.8, 1.3)†‡      | 0.9 (0.6, 1.1)†‡     | 1.0 (0.8, 1.2)†‡     | 0.6 (0.5, 0.8)†‡     |
| Schober's test | SSZ | 0.9 (0.5, 1.3)‡       | 0.3 (-0.2, 0.8)‡     | -0.0 (-0.6, 0.5)‡    | 0.4 (-0.0, 0.8)‡     |
|                | PBO | 0.1 (-0.2, 0.5)       | 0.1 (-0.3, 0.5)      | 0.1 (-0.3, 0.4)      | -0.1 (-0.3, 0.2)     |
| OWD            | ETN | -1.2 (-1.6, -0.8)     | -0.9 (-1.4, -0.5)    | -0.9 (-1.4, -0.5)    | -0.8 (-1.1, -0.5)    |
|                | SSZ | -0.1 (-0.7, 0.5)      | -0.3 (-1.0, 0.4)     | -0.5 (-1.3, 0.2)     | -0.6 (-1.3, 0.0)     |

|     |     |                                    |                                    |                                    |                                    |
|-----|-----|------------------------------------|------------------------------------|------------------------------------|------------------------------------|
|     | PBO | -1.0 (-2.0, 0.1)                   | 0.1 (-1.2, 1.5)                    | -0.5 (-1.6, 0.6)                   | 0.1 (-0.7, 0.9)                    |
| PGA | ETN | -33.9 (-36.9, -30.9) <sup>†‡</sup> | -28.9 (-32.4, -25.4) <sup>†‡</sup> | -30.8 (-34.2, -27.4) <sup>†‡</sup> | -29.1 (-31.4, -26.7) <sup>†‡</sup> |
|     | SSZ | -22.8 (-28.5, -17.2)               | -24.6 (-31.5, -17.7)               | -24.1 (-31.7, -16.7)               | -23.4 (-29.2, -17.5)               |
|     | PBO | -17.9 (-23.6, -12.1)               | -5.6 (-13.0, 1.8)                  | -16.1 (-22.0, -10.2)               | -13.6 (-18.0, -9.3)                |

\* All values are adjusted mean change (95% confidence interval) unless otherwise noted.

<sup>†</sup>  $p \leq 0.05$  as ordered (trend) using Cochran-Mantel-Haenszel (CMH) test of non-zero correlation for dichotomous outcomes or an ANCOVA model, with baseline of outcome, study, and disease duration as predictors for continuous outcomes.

<sup>‡</sup>  $p \leq 0.05$  for disease duration categories analyzed as non-ordered, nominal using CMH test of general association for dichotomous outcomes or an ANCOVA model, with baseline of outcome, study, and disease duration as predictors for continuous outcomes.

$\Delta$  = change; ASAS20 = Assessment in Ankylosing Spondylitis improvement of 20%; ASDAS = Ankylosing Spondylitis Disease Activity Score; BASDAI = Bath Ankylosing Spondylitis Disease Activity Index, BASFI = Bath Ankylosing Spondylitis Disease Functional Index; CRP = C-reactive protein; ETN = etanercept; OWD = occiput-to-wall distance; PBO = placebo; PGA = physician global assessment; SSZ = sulfasalazine; tx = treatment.

Supplementary Table 2. Treatment outcomes at week 12 in patients aged  $\leq 40$  years versus  $>40$  years at diagnosis, by disease duration subgroup\*

|         |     | Disease Duration by Age Subgroup and Treatment (n) |                |                  |                |                   |                |                 |                |
|---------|-----|----------------------------------------------------|----------------|------------------|----------------|-------------------|----------------|-----------------|----------------|
|         |     | $\leq 2$ Years                                     |                | $> 2$ to 5 Years |                | $> 5$ to 10 Years |                | $> 10$ Years    |                |
| Outcome | Tx  | Age $\leq 40$ y                                    | Age $> 40$ y   | Age $\leq 40$ y  | Age $> 40$ y   | Age $\leq 40$ y   | Age $> 40$ y   | Age $\leq 40$ y | Age $> 40$ y   |
|         |     | ETN (151)                                          | ETN (74)       | ETN (99)         | ETN (43)       | ETN (113)         | ETN (37)       | ETN (268)       | ETN (23)       |
|         |     | SSZ (40)                                           | SSZ (16)       | SSZ (27)         | SSZ (10)       | SSZ (24)          | SSZ (7)        | SSZ (40)        | SSZ (10)       |
|         |     | PBO (31)                                           | PBO (19)]      | PBO (19)         | PBO (9)        | PBO (33)          | PBO (13)       | PBO (86)        | PBO (10)       |
| ASDAS-  | ETN | -1.8                                               | -1.5           | -1.8             | -1.4           | -1.8              | -1.2           | -1.6            | -1.3           |
| CRP     |     | (-2.0, -1.7)†                                      | (-1.9, -1.2)   | (-2.0, -1.6)†    | (-1.7, -1.0)   | (-2.0, -1.6)†     | (-1.6, -0.9)   | (-1.7, -1.5)†   | (-1.7, -0.8)   |
|         | SSZ | -0.9                                               | -0.4           | -0.8             | -0.8           | -0.9              | -0.9           | -0.8            | -0.3           |
|         |     | (-1.2, -0.6)                                       | (-0.8, -0.0)   | (-1.2, -0.5)     | (-1.4, -0.2)   | (-1.2, -0.5)      | (-1.5, -0.3)   | (-1.1, -0.6)    | (-0.8, 0.2)    |
|         | PBO | -0.8                                               | -0.5           | -0.3             | 0.2            | -0.4              | -0.5           | -0.5            | -0.5           |
|         |     | (-1.1, -0.4)                                       | (-1.0, -0.1)   | (-0.7, 0.2)      | (-0.4, 0.8)    | (-0.7, -0.1)      | (-1.0, 0.0)    | (-0.7, -0.2)    | (-1.1, 0.0)    |
| BASDAI  | ETN | -34.2                                              | -31.8          | -31.8            | -26.9          | -31.9             | -25.6          | -29.1           | -25.4          |
|         |     | (-38.1, -30.4)†                                    | (-39.0, -24.5) | (-36.2, -27.4)†  | (-35.5, -18.3) | (-36.1, -27.7)†   | (-34.8, -16.5) | (-31.7, -26.4)† | (-35.2, -15.6) |
|         | SSZ | -19.9                                              | -10.2          | -20.3            | -24.5          | -19.6             | -19.3          | -19.3           | -14.4          |
|         |     | (-26.8, -13.0)                                     | (-20.7, 0.3)   | (-28.7, -11.9)   | (-38.8, -10.3) | (-28.4, -10.9)    | (-35.3, -3.3)  | (-26.0, -12.6)  | (-27.7, -1.1)  |
|         | PBO | -20.1                                              | -11.2          | -9.0             | 2.6            | -12.9             | -15.1          | -11.1           | -12.9          |
|         |     | (-27.5, -12.7)                                     | (-21.8, -0.6)  | (-18.2, 0.2)     | (-11.7, 16.9)  | (-20.0, -5.8)     | (-27.7, -2.6)  | (-15.9, -6.3)   | (-26.2, 0.5)   |
| BASFI   | ETN | -25.7                                              | -26.5          | -26.5            | -21.5          | -24.9             | -20.2          | -20.5           | -23.4          |

|           |     |                 |                |                 |                |                 |                |                 |                |
|-----------|-----|-----------------|----------------|-----------------|----------------|-----------------|----------------|-----------------|----------------|
|           |     | (-29.6, -21.8)† | (-34.0, -18.9) | (-31.0, -22.0)† | (-30.4, -12.7) | (-29.1, -20.7)† | (-29.6, -10.7) | (-23.3, -17.8)† | (-33.5, -13.2) |
|           | SSZ | -17.1           | -0.3           | -16.7           | -21.0          | -15.5           | -18.6          | -15.5           | -13.3          |
|           |     | (-23.5, -10.7)  | (-12.0, 11.4)  | (-24.6, -8.9)   | (-37.0, -5.1)  | (-23.7, -7.3)   | (-36.3, -0.9)  | (-21.8, -9.2)   | (-28.3, 1.7)   |
|           | PBO | -15.2           | -10.0          | -2.0            | 9.9            | -7.0            | -8.8           | -6.4            | -11.4          |
|           |     | (-21.9, -8.5)   | (-20.8, 0.9)   | (-10.3, 6.3)    | (-4.4, 24.2)   | (-13.4, -0.6)   | (-21.6, 3.9)   | (-10.8, -2.1)   | (-25.4, 2.7)   |
| CRP       | ETN | -14.7           | -8.0           | -14.2           | -9.9           | -14.2           | -3.4           | -14.1           | -7.1           |
|           |     | (-16.5, -12.9)  | (-12.2, -3.9)  | (-16.3, -12.2)  | (-14.8, -5.1)  | (-16.1, -12.3)  | (-8.6, 1.8)    | (-15.3, -12.9)  | (-12.6, -1.5)  |
|           | SSZ | -5.9            | -1.9           | -3.8            | -1.4           | -2.0            | -2.0           | 0.5             | 6.2            |
|           |     | (-9.7, -2.2)†   | (-6.9, 3.1)    | (-8.3, 0.7)†    | (-7.9, 5.1)    | (-6.8, 2.8)†    | (-9.6, 5.7)    | (-3.3, 4.2)†    | (-0.3, 12.8)   |
|           | PBO | -3.0            | 0.5            | 3.1             | 0.2            | 2.7             | 5.5            | -3.1            | -4.3           |
|           |     | (-8.6, 2.6)     | (-5.4, 6.5)    | (-3.8, 10.1)    | (-7.6, 8.0)    | (-2.6, 8.1)     | (-1.6, 12.5)   | (-6.7, 0.6)     | (-11.8, 3.1)   |
| Modified  | ETN | 1.0             | 1.2            | 0.9             | 0.9            | 1.1             | 0.7            | 0.6             | 0.9            |
| Schober's |     | (0.7, 1.2)†‡    | (0.7, 1.7)     | (0.6, 1.2)†‡    | (0.3, 1.5)     | (0.8, 1.4)†‡    | (0.0, 1.3)     | (0.4, 0.8)†‡    | (0.2, 1.5)     |
| test      | SSZ | 0.8             | 1.1            | 0.4             | 0.2            | 0.0             | 0.1            | 0.3             | 0.7            |
|           |     | (0.4, 1.3)      | (0.4, 1.8)     | (-0.2, 0.9)     | (-0.7, 1.0)    | (-0.7, 0.6)     | (-1.0, 1.2)    | (-0.2, 0.8)     | (-0.1, 1.5)    |
|           | PBO | 0.3             | -0.1           | -0.1            | 0.6            | 0.0             | 0.2            | -0.1            | 0.4            |
|           |     | (-0.1, 0.7)     | (-0.7, 0.6)    | (-0.5, 0.4)     | (-0.3, 1.5)    | (-0.3, 0.4)     | (-0.6, 1.0)    | (-0.4, 0.1)     | (-0.4, 1.2)    |
| OWD       | ETN | -1.2            | -1.5           | -0.9            | -1.1           | -0.9            | -1.5           | -0.8            | -0.7           |
|           |     | (-1.6, -0.7)    | (-2.4, -0.6)   | (-1.4, -0.4)    | (-2.2, -0.1)   | (-1.4, -0.4)    | (-2.6, -0.4)   | (-1.1, -0.5)    | (-1.9, 0.5)    |

|     |     |                                       |                         |                                       |                         |                                       |                         |                                       |                         |
|-----|-----|---------------------------------------|-------------------------|---------------------------------------|-------------------------|---------------------------------------|-------------------------|---------------------------------------|-------------------------|
|     | SSZ | -0.3<br>(-1.1, 0.4)                   | 0.7<br>(-0.4, 1.9)      | -0.3<br>(-1.2, 0.5)                   | -0.1<br>(-1.5, 1.3)     | -1.0<br>(-1.9, -0.1)                  | 0.9<br>(-0.8, 2.6)      | -0.8<br>(-1.5, -0.1)                  | -0.2<br>(-1.6, 1.2)     |
|     | PBO | -0.9<br>(-2.3, 0.6)                   | -0.9<br>(-2.1 to 0.3)   | -0.3<br>(-2.1, 1.4)                   | 1.3<br>(-0.2, 2.9)      | -0.6<br>(-1.9, 0.8)                   | 0.1<br>(-1.3, 1.5)      | 0.2<br>(-0.7, 1.2)                    | -0.4<br>(-1.9, 1.0)     |
| PGA | ETN | -35.3<br>(-38.8, -31.7) <sup>†‡</sup> | -31.0<br>(-37.3, -24.7) | -30.9<br>(-35.0, -26.8) <sup>†‡</sup> | -24.0<br>(-31.4, -16.6) | -32.6<br>(-36.5, -28.8) <sup>†‡</sup> | -25.6<br>(-33.5, -17.7) | -29.1<br>(-31.6, -26.7) <sup>†‡</sup> | -28.0<br>(-36.4, -19.5) |
|     | SSZ | -24.5<br>(-31.2, -17.9)               | -17.5<br>(-28.9, -6.1)  | -22.4<br>(-30.5, -14.3)               | -31.5<br>(-45.6, -17.3) | -24.8<br>(-33.4, -16.2)               | -22.2<br>(-38.6, -5.8)  | -23.9<br>(-30.4, -17.3)               | -21.4<br>(-35.1, -7.7)  |
|     | PBO | -20.3<br>(-27.4, -13.2)               | -15.2<br>(-26.2, -4.3)  | -8.5<br>(-17.2, 0.3)                  | 1.5<br>(-13.2, 16.2)    | -16.4<br>(-23.2, 9.6)                 | -17.8<br>(-30.9, -4.7)  | -11.9<br>(-16.5, -7.3)                | -20.9<br>(-34.7, -7.1)  |
|     |     |                                       |                         |                                       |                         |                                       |                         |                                       |                         |

\* All values are adjusted mean change (95% confidence interval) unless otherwise noted.

† In the subgroup of patients aged  $\leq 40$  years at diagnosis,  $p \leq 0.05$  as ordered (trend) using the Cochran-Mantel-Haenszel (CMH) test of non-zero correlation for dichotomous outcomes or an ANCOVA model, with baseline of outcome, study, and disease duration as predictors for continuous outcomes

‡ In the subgroup of patients aged  $\leq 40$  years at diagnosis,  $P \leq 0.05$  for disease duration categories analyzed as non-ordered, nominal, using the CMH test of general association for dichotomous outcomes or an ANCOVA model, with baseline of outcome, study, and disease duration as predictors for continuous outcomes.

ASDAS = Ankylosing Spondylitis Disease Activity Score; BASDAI = Bath Ankylosing Spondylitis Disease Activity Index, BASFI = Bath Ankylosing Spondylitis Disease Functional Index; CRP = C-reactive protein; ETN = etanercept; OWD = occiput-to-wall distance; PBO = placebo; PGA = physician's global assessment; SSZ = sulfasalazine; tx = treatment.
